# Supplementary material for: Groundnut Bud Necrosis Virus Modulates the Expression of Innate Immune, Endocytosis, and Cuticle Development-Associated Genes to Circulate and Propagate in Its Vector, Thrips palmi
Source: Frontiers journal article supplement (doi:10.3389/fmicb.2022.773238), 2022-03-17
Supplement: Data_Sheet_1.pdf [file Data_Sheet_1.pdf]

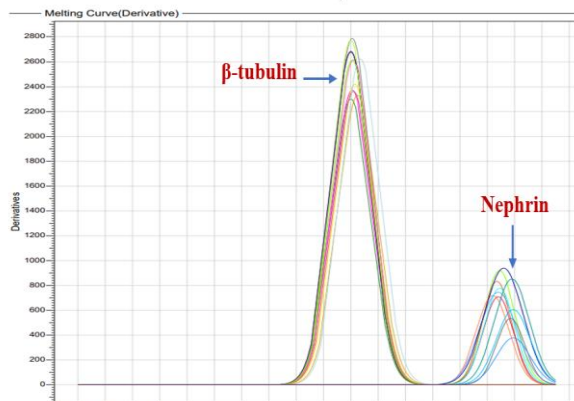

1. Nephtrin

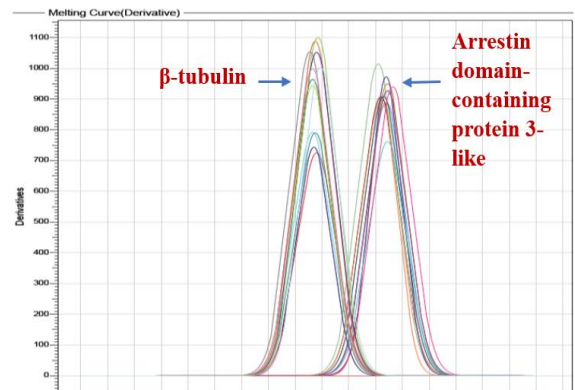

2. Arrestin domain-containing protein 3-like

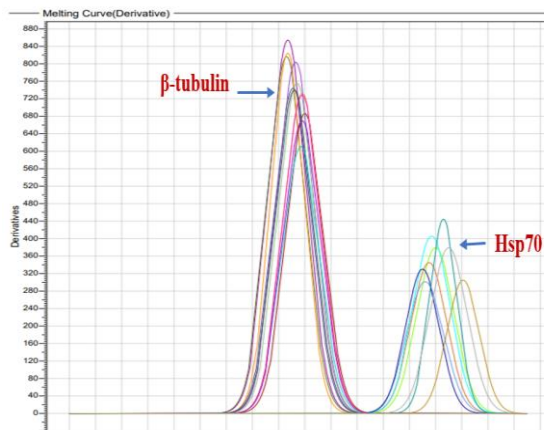

3. Heat shock protein 70

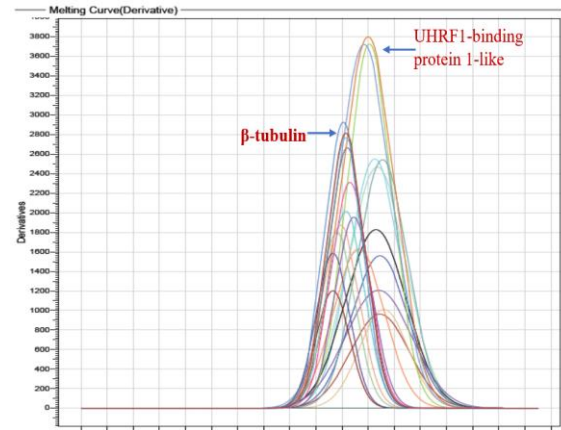

4. UHRF1-binding protein 1-like

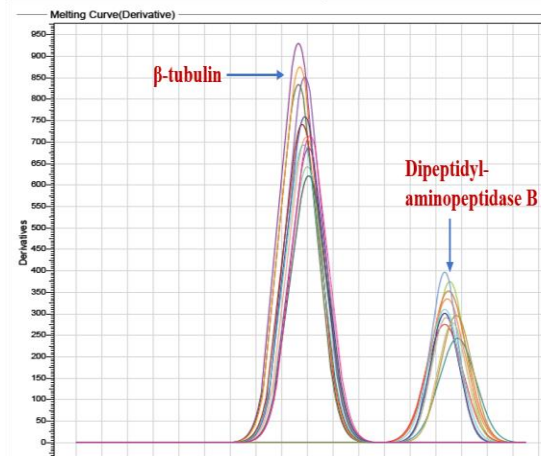

5. Dipeptidyl-aminopeptidase B

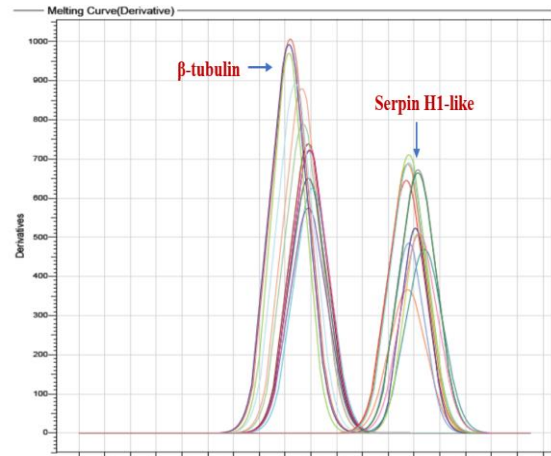

6. Serpin H1-like

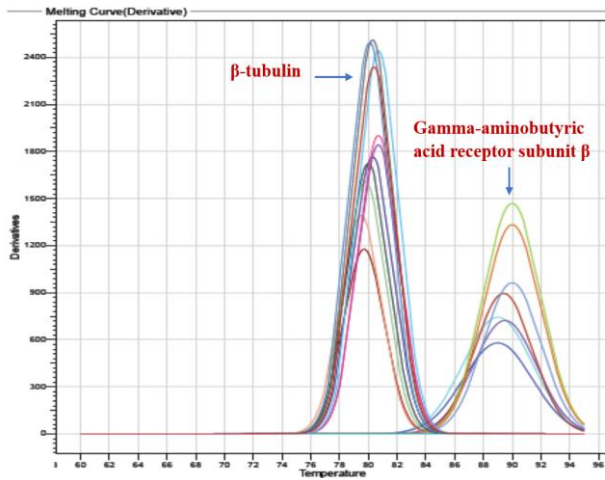

7. Gamma-aminobutyric acid receptor subunit beta

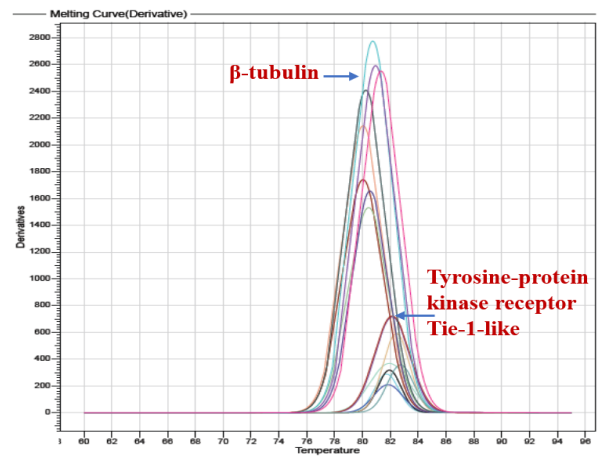

8. Tyrosin-protein kinase receptor Tie 1-like

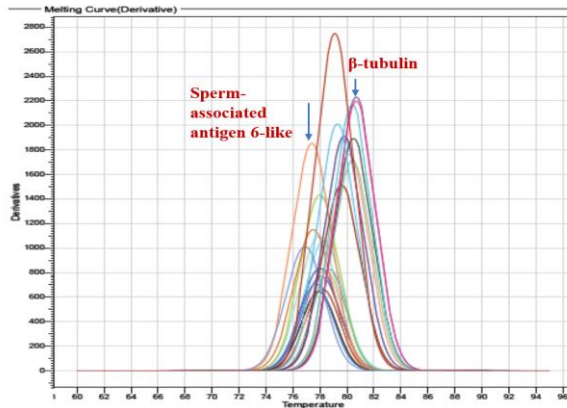

9. Sperm associated antigen 6-like

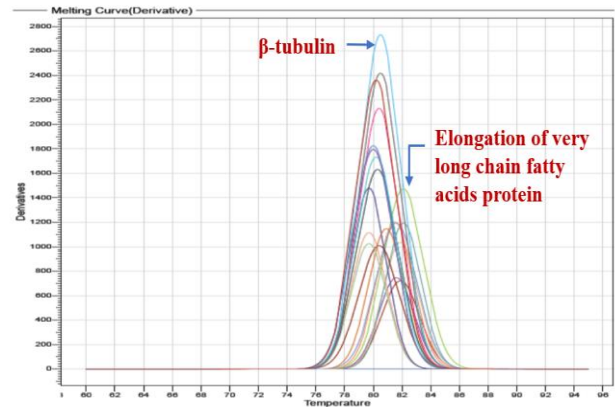

10. Elongation of very long chain fatty acids protein

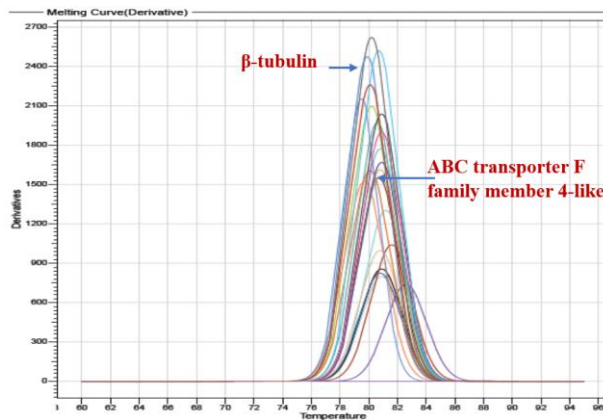

11. ABC transporter F family member 4-like

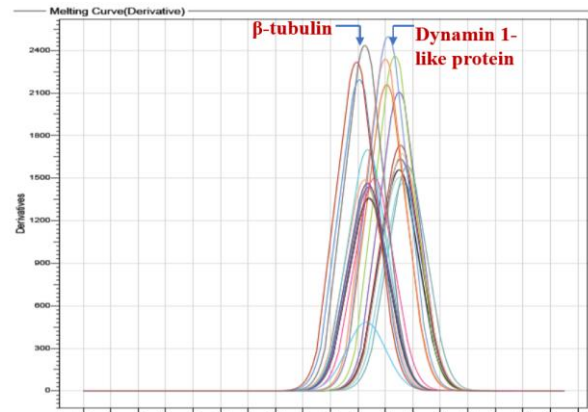

12. Dynamin 1-like protein

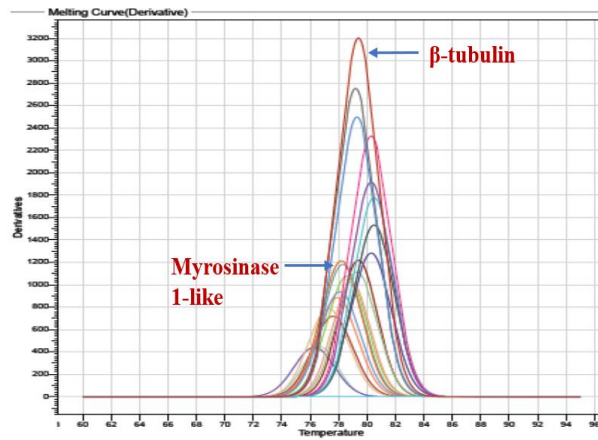

**Supplementary figure 1.** Melting curves of target and endogenous control genes of *Thrips palmi* in qRT-PCR

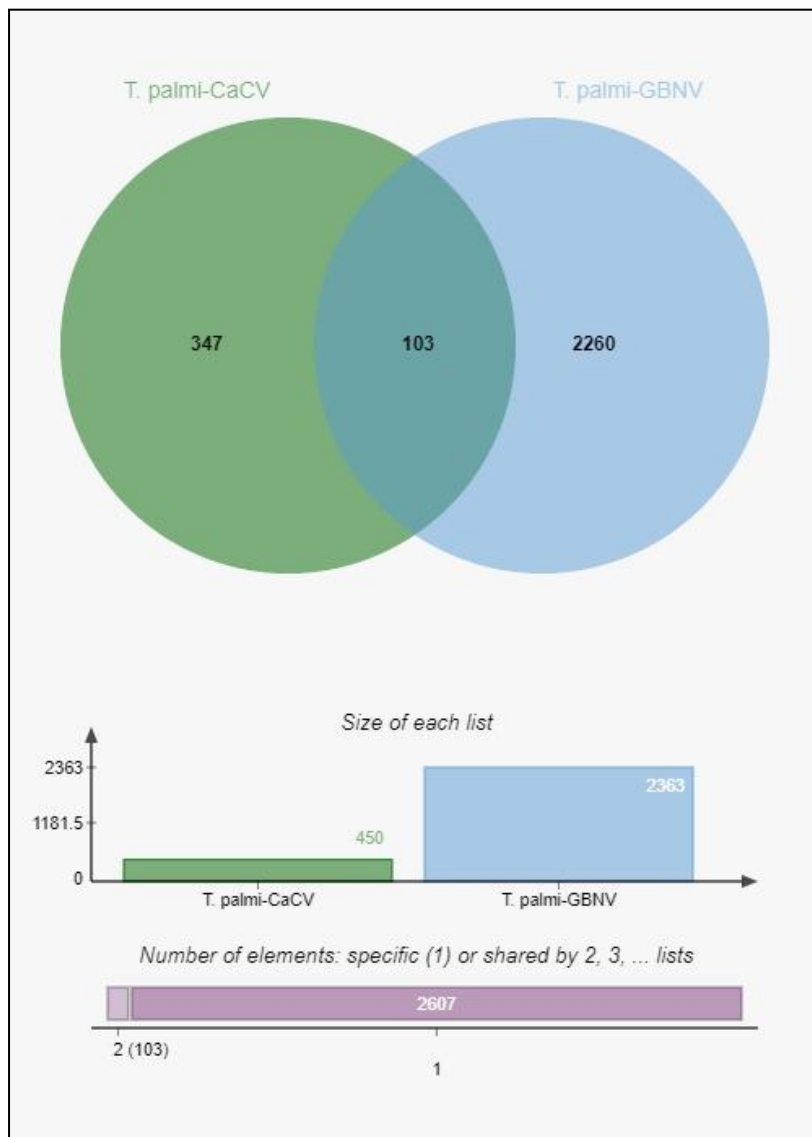

**Supplementary figure 2.** Venn diagram of DEGs of *T. palmi* in response to GBNV and CaCV infection. A total of 103 DEGs are conserved in response to GBNV and CaCV infection.

**Supplementary Table 1.** List of primers used in the study

| S. No.                                                                | Gene name                         | Primer Name | Primer Sequence            | Annealing temperature (°C) in PCR | Amplicon size (bp) | Melting temperature (°C) in RT-qPCR | References          |
|-----------------------------------------------------------------------|-----------------------------------|-------------|----------------------------|-----------------------------------|--------------------|-------------------------------------|---------------------|
| Primer used for <i>Thrips palmi</i> identification in PCR             |                                   |             |                            |                                   |                    |                                     |                     |
| 1                                                                     | Mt Cox I region, universal primer | LCO1490     | GGTCAACAAATCATAAAGATATTG   | 50                                | 657                | -                                   | Folmer et al., 1994 |
|                                                                       |                                   | HC02198     | TAAACTTCAGGGTGACCAAAAAATCA |                                   |                    |                                     |                     |
| Primer used for Groundnut bud necrosis virus diagnosis in PCR         |                                   |             |                            |                                   |                    |                                     |                     |
| 2                                                                     | GBNV N gene                       | AG109-F     | CCATCTACTTCAGTAGAAAACACTAG | 59                                | 1767               | -                                   | This study          |
|                                                                       |                                   | AG110-R     | AGAGCAATCAGTGCAACAATTAAATA |                                   |                    |                                     |                     |
| Primers used for <i>Thrips palmi</i> gene expression study in qRT-PCR |                                   |             |                            |                                   |                    |                                     |                     |
| 3                                                                     | β- tubulin (endogenous control)   | AG171-F     | CCAGCCACATTCTGATAC         | 53-59                             | 117                | 79.5                                | Gamage et al. 2018  |
|                                                                       |                                   | AG172-R     | ATGCGTTGGCAGTCACATAC       |                                   |                    |                                     |                     |
| 4                                                                     | Gamma-aminobutyric acid receptor  | AG347-F     | CGGTTTCATAGTTCACGACCC      | 55                                | 221                | 89.4                                | This study          |
|                                                                       |                                   | AG348-R     | ATGAGGTTGAAGCACACGAA       |                                   |                    |                                     |                     |
| 5                                                                     | Heat shock 70 kDa protein II-like | AG353-F     | GTATGGTACCAGGGGAAGGT       | 59                                | 156                | 88.3                                | This study          |
|                                                                       |                                   | AG354-R     | CTTTGCGTCGAACACGGT         |                                   |                    |                                     |                     |
| 6                                                                     | Dipeptidyl-aminopeptidase B       | AG361-F     | CGGTACCCGAAGATCAACAC       | 53                                | 163                | 89.1                                | This study          |
|                                                                       |                                   | AG362-R     | AGTAGTAGTCGGACTCCCTG       |                                   |                    |                                     |                     |
| 7                                                                     | Nephrin-like                      | AG363-F     | CCGAGAAGCAGACTGAAGAG       | 59                                | 189                | 91.1                                | This study          |
|                                                                       |                                   | AG364-R     | AATCCTTGTTGCAGGGGATG       |                                   |                    |                                     |                     |
| 8                                                                     | Sperm-associated antigen 6-like   | AG375-F     | GACAAGAAGGAGACGTGGCT       | 55                                | 171                | 77.9                                | This study          |
|                                                                       |                                   | AG376-R     | AGACAGCACCGAGGGTTTG        |                                   |                    |                                     |                     |
| 9                                                                     | UHRF1-binding protein 1           | AG379-F     | CGGAGGTGCTCTTCAAATCA       | 55                                | 190                | 82.7                                | This study          |
|                                                                       |                                   | AG380-R     | AACTGCACGGTTGCTTTCTA       |                                   |                    |                                     |                     |
| 10                                                                    | ABC transporter                   | AG383-F     | GAGGAAGCGTGAACCATCTG       | 55                                | 159                | 80.6                                | This study          |

|    |                                                   |         |                        |    |     |       |            |
|----|---------------------------------------------------|---------|------------------------|----|-----|-------|------------|
|    |                                                   | AG384-R | TCCTCCTCATGCTGATCTGT   |    |     |       |            |
| 11 | Arrestin domain-containing protein                | AG389-F | GAGTCTTCCTGAACGTGAGC   | 54 | 113 | 82.7  | This study |
|    |                                                   | AG390-R | GCCGTGACTGTTAGACTTGG   |    |     |       |            |
| 12 | Dynamin-1-like protein                            | AG399-F | CGTAGTCGCTAAAACCGTCA   | 55 | 173 | 82.8  | This study |
|    |                                                   | AG400-R | TAGTTTCGGCTCTCAGTTGC   |    |     |       |            |
| 13 | Elongation of very long chain fatty acids protein | AG403-F | CGAATGGATACCACACCCAC   | 55 | 171 | 86.2  | This study |
|    |                                                   | AG404-R | GTGGTTCAATCCTGTACGCA   |    |     |       |            |
| 14 | Myrosinase 1-like                                 | AG411-F | TCTACGAGCGCGAGTTTAAG   | 55 | 188 | 80.2  | This study |
|    |                                                   | AG412-R | GTTCTCTTCATGAGCTCGG    |    |     |       |            |
| 15 | Serpin H1-like                                    | AG431-F | GAGTCCCCCGGTATCTCCAA   | 59 | 183 | 85.88 | This study |
|    |                                                   | AG432-R | GCGCAGGTAGAAGACAAAGG   |    |     |       |            |
| 16 | Tyrosine-protein kinase receptor Tie-1-like       | AG433-F | CAGCAAGGTATAACGCACCT   | 55 | 114 | 81.6  | This study |
|    |                                                   | AG434-R | RGACAGAGCCTTCTCCTTTTCG |    |     |       |            |

**Supplementary Table 2.** Summary statistics of generated RNA-Seq data, before and after pre-processing along with the mapping percentage with the reference genome of *Thrips palmi*

| Sample | Raw reads | Filtered reads    | % of reads mapped with reference genome |
|--------|-----------|-------------------|-----------------------------------------|
| TpTrH1 | 24463812  | 24452353 (99.95%) | 97.65                                   |
| TpTrH2 | 25960270  | 25947964 (99.95%) | 97.80                                   |
| TpTrH3 | 25490048  | 25478767 (99.95%) | 97.72                                   |
| TpTrI1 | 24893045  | 24885567 (99.96%) | 96.22                                   |
| TpTrI2 | 26320266  | 26316161 (99.98%) | 97.34                                   |
| TpTrI3 | 29000000  | 28993257 (99.97%) | 97.11                                   |

**Supplementary Table 3.** Relative expression of *T. palmi* candidate genes in RNA-Seq and RT-qPCR

| Sl. No. | Candidate gene                                                    | Relative expression in Log <sub>2</sub> fold change |         | Remarks       |
|---------|-------------------------------------------------------------------|-----------------------------------------------------|---------|---------------|
|         |                                                                   | RNA-Seq (P-adj)                                     | RT-qPCR |               |
| 1.      | UHRF1-binding protein 1-like isoform X3                           | 5.35 (8.31E-49)                                     | 5.5     | Upregulated   |
| 2.      | Nephrin-like                                                      | 5.68 (1.39E-10)                                     | 4.8     |               |
| 3.      | Sperm-associated antigen 6-like                                   | 5.12 (1.07E-06)                                     | 3.37    |               |
| 4.      | Heat shock 70 kDa protein II-like                                 | 2.22 (6.00E-07)                                     | 0.98    |               |
| 5.      | Gamma-aminobutyric acid receptor subunit beta isoform X8          | 5.14 (4.51E-07)                                     | 0.80    |               |
| 6.      | LOW-QUALITY PROTEIN: probable dipeptidyl-aminopeptidase B         | 5.99 (2.31E-42)                                     | 1.64    |               |
| 7.      | Serpin H1-like                                                    | -6.25 (1.98E-99)                                    | 8.5     | Downregulated |
| 8.      | Tyrosine-protein kinase receptor Tie-1-like                       | -4.88 (1.37E-111)                                   | 4.3     |               |
| 9.      | ABC transporter F family member 4-like                            | -5.11 (2.06E-20)                                    | 3.57    |               |
| 10.     | Arrestin domain-containing protein 3-like                         | -8.96 (1.73E-196)                                   | 1.65    |               |
| 11.     | Elongation of very-long-chain fatty acids protein AAEL008004-like | -6.80 (2.61E-32)                                    | 1.36    |               |
| 12.     | Dynamin-1-like protein                                            | -4.73 (4.80E-185)                                   | 0.66    |               |
| 13.     | Myrosinase 1-like                                                 | -5.92 (9.55E-222)                                   | 2.57    |               |

The relative expression of candidate genes was estimated by comparing three sets of viruliferous and three sets of non-viruliferous *T. palmi* populations. The statistical significance of log<sub>2</sub> fold change in RNA-Seq was assessed using adjusted P values taking into account the false discovery rate (FDR). The adjusted P values are mentioned in parenthesis. The fold-change in RT-qPCR was estimated by  $2^{-\Delta\Delta CT}$  method (Livak and Schmittgen 2001). The  $\Delta CT$  was calculated as CT of targeted gene - CT of endogenous control.  $\Delta\Delta CT$  value was calculated by average  $\Delta CT$  of non-viruliferous replicates -  $\Delta CT$  of each replicate. The average  $2^{-(\Delta\Delta CT)}$  was calculated for both the viruliferous and non-viruliferous replicates and transformed to log<sub>2</sub>  $2^{-(\Delta\Delta CT)}$ . The log<sub>2</sub>-fold change of the gene expression in the viruliferous *T. palmi* population was estimated by normalizing the values. The correlation of RNA-Seq and RT-qPCR values was calculated using CORREL function in MS Excel. Pearson's correlation coefficient value was 0.81.
